# Supplementary material for: Long–echo time MR spectroscopy for skeletal muscle acetylcarnitine detection
Source: JCI journal article supplement (doi:10.1172/jci74830), 2014-09-30
Supplement: sd1 [file 1]

## SUPPLEMENTAL DATA

SUPPLEMENTAL FIGURE 1:

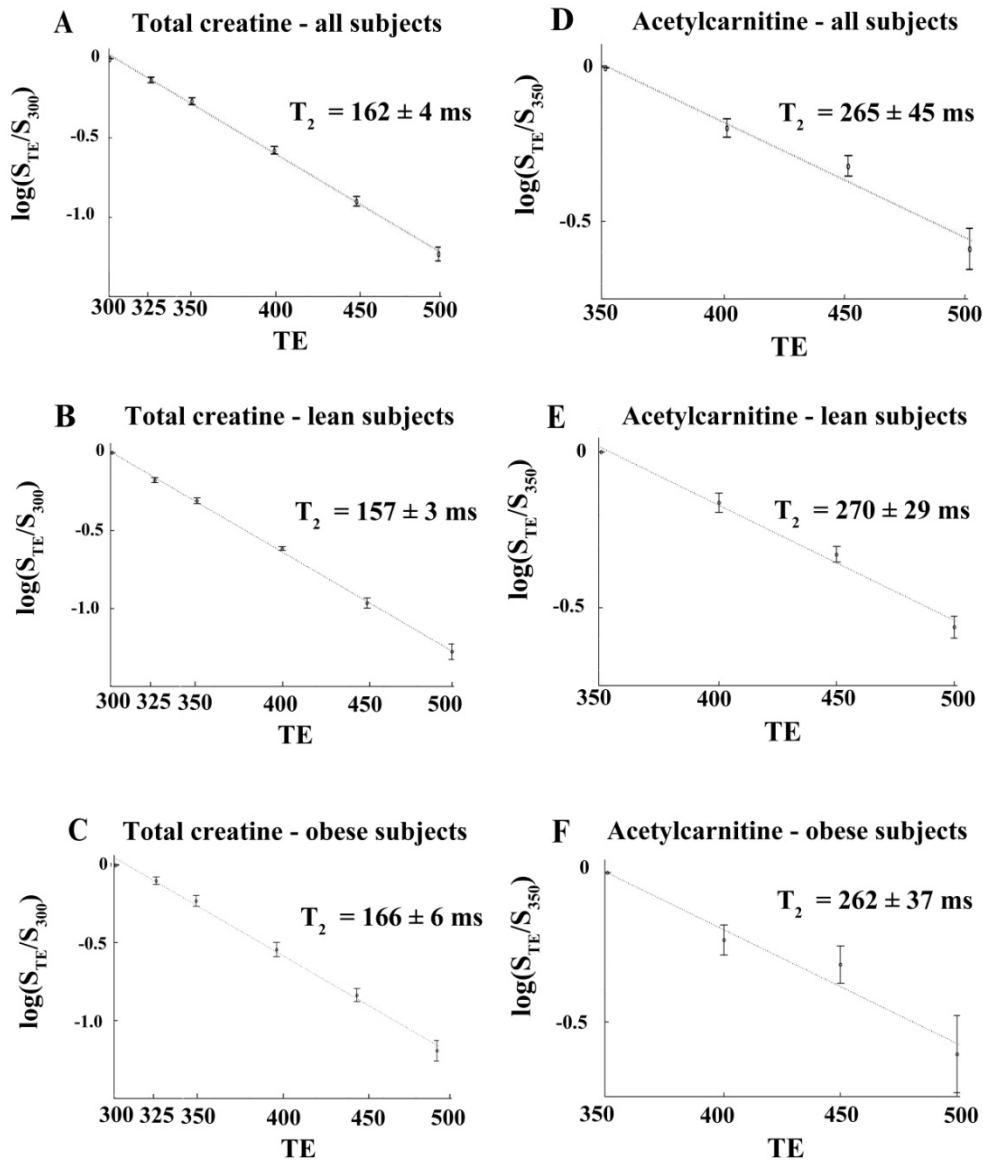

**Supplemental figure 1.  $T_2$  relaxation times of total creatine and acetylcarnitine.** Results are expressed as mean  $\pm$  SEM. *Panel A-C:* Fits for total creatine transverse relaxation rates of all subjects ( $N = 14$ ), the lean subjects ( $N = 7$ ) and the obese subjects ( $N = 7$ ) respectively. Intensity of the total creatine peak was determined at TE's ranging from 300 – 500 ms and the normalized peak intensity was plotted semi-logarithmically. The  $T_2$  of total creatine was not different between lean and obese subjects ( $P = 0.24$ ). *Panel D-F:* Fits for acetylcarnitine transverse relaxation rates of all subjects ( $N = 14$ ), the lean subjects ( $N = 7$ ) and the obese subjects ( $N = 7$ ) respectively. Intensity of the acetylcarnitine peak was determined at TE's ranging from 350 – 500 ms and the normalized peak intensity was plotted semi-logarithmically. The  $T_2$  of acetylcarnitine was not different between lean and obese subjects ( $P = 0.88$ ).
